# Supplementary material for: Cordycepin Enhances Radiosensitivity in Oral Squamous Carcinoma Cells by Inducing Autophagy and Apoptosis Through Cell Cycle Arrest
Source: PubMed Central journal article supplement (PMC6862293; doi:10.3390/ijms20215366), 2019-10-28
Supplement: ijms-20-05366-s001.pdf [file ijms-20-05366-s001.pdf]

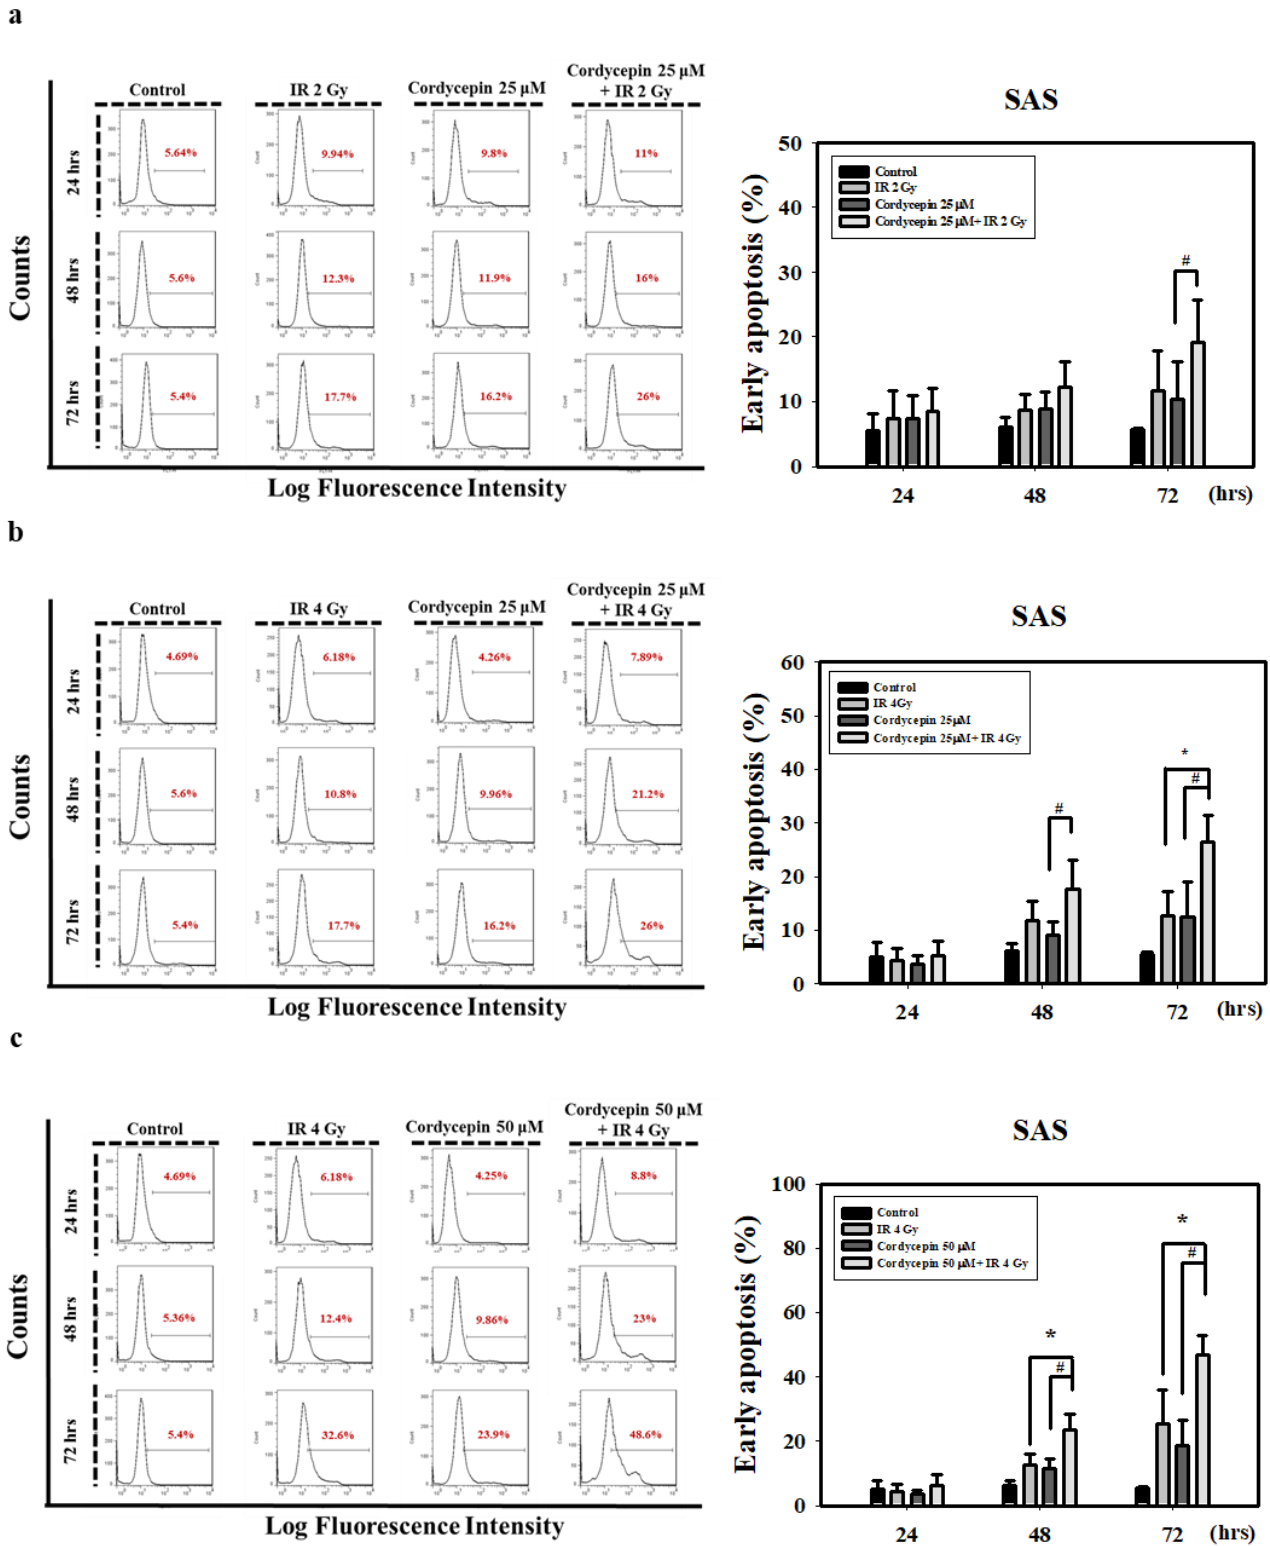

**Figure S1.** Measurement of apoptosis in SAS cells receiving various treatments. Early apoptosis detection was measured by flow cytometry with an annexin V apoptosis detection kit. (a) Cells were treated with 2 Gy IR and/or 25 μM cordycepin for 24, 48 and 72 h. (b) Cells were treated with 4 Gy IR and/or 25 μM cordycepin for 24, 48 and 72 h. (c) Cells were treated with 4 Gy IR and/or 50 μM cordycepin for 24, 48 and 72 h.  $^{\#}p < 0.05$ , cordycepin versus IR + cordycepin.  $^*p < 0.05$ , IR versus IR + cordycepin.

**a**

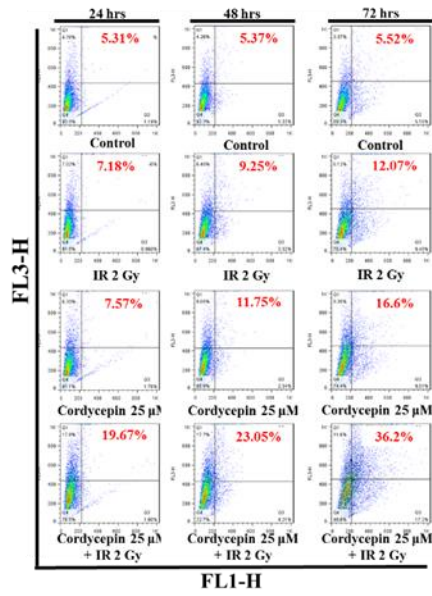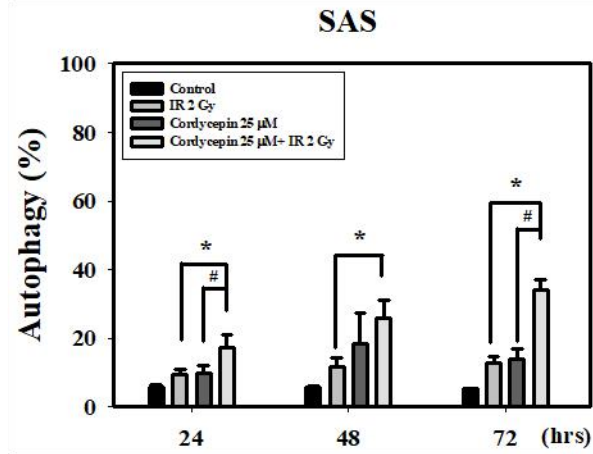

**b**

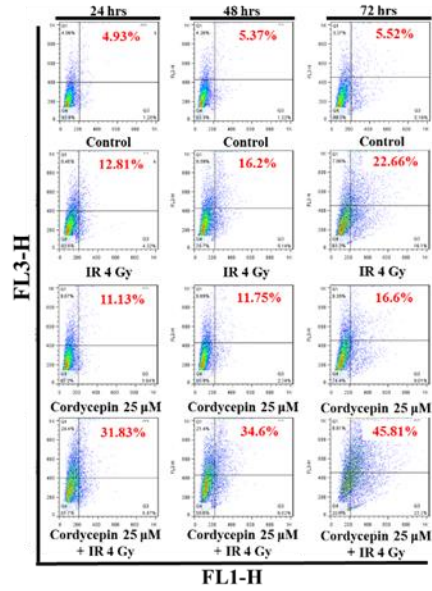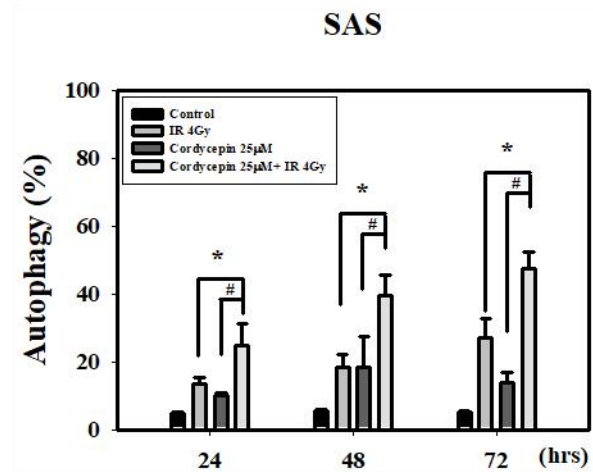

**Figure S2.** Measurement of autophagy in SAS cells receiving various treatments. Measurement of autophagy in SAS cells.

Detection of green and red fluorescence in AO-stained cells using flow cytometry. Quantification of AVOs with AO using flow cytometry. (a) SAS cells were treated with IR (2 Gy) and/or cordycepin (25 μM) for 24, 48 and 72 h. (b) SAS cells were treated with IR (4 Gy) and/or cordycepin (25 μM) for 24, 48, and 72 h.  $^{\#}p < 0.05$ , cordycepin versus IR + cordycepin.  $*p < 0.05$ , IR versus IR + cordycepin.
